# Supplementary material for: Structural MRI Biomarkers of Intracranial Pressure in IIH: Linking Optic Nerve Sheath, Pituitary Morphology, and Hormonal Changes
Source: Research Square preprint supplement (doi:10.21203/rs.3.rs-7177945/v1), 2025-08-07
Supplement: Supplementary file 1 [file 15102c49ac61aa8349d06e96.docx]

**Supplementary Information**

Article Title: Structural MRI Biomarkers of Intracranial Pressure in IIH: Linking Optic Nerve Sheath, Pituitary Morphology, and Hormonal Changes

Journal: Clinical Neuroradiology

Authors: Zeynep Bendella, Barbara Daria Wichtmann, Ralf Clauberg, Wiebke Fenske, Charlotte Fries, Monika Jeub, Martina Minnerop, Arndt-Hendrik Schievelkamp, Franziskus M. Schützeichel, Bettina Wabbels, Christina Schaub, Max Witry, Berkan Koyak, Alexander Radbruch, Jennifer Linder, Ullrich Wüllner, Christine Kindler

Corresponding Author: Zeynep Bendella, MD

Affiliation: Department of Neuroradiology, University Hospital of Bonn, Bonn, Germany

E-Mail : [zeynep.bendella@ukbonn.de](mailto:zeynep.bendella@ukbonn.de)

**Table S3** Frequency of Laboratory Abnormalities

|  | **Reference Values** | **ICP < 25 cmH2O**  **(%) (n)** | **ICP ≥ 25 cmH2O**  **(%) (n)** | ***P V*alue** | **Test Statistik** | **Phi Coefficient (φ)** |
| --- | --- | --- | --- | --- | --- | --- |
| **TSH [%]** | 0.27 - 4.2 μU/ml | 0 (n = 0/8) | 0 (n = 0/10) | NA | NA | NA |
| **fT3 [%]** | 2.2 - 4.0 pg/ml | 0 (n = 0/8) | 0 (n = 0/9) | NA | NA | NA |
| **fT4 [%]** | 0.93 - 1.7 ng/dl | 0 (n = 0/8) | 10 (n = 1/10) ↓ | 1.000 | χ2(1) = 0.847 | -0.217 |
| **Intake of Levothyroxine %]** |  | 13 (n = 1/8) | 30 (n = 3/10) | 0.588 | χ2(1) = 0.788 | -0.209 |
| **LH [%]** | 1.0 - 95.6 U/l | 0 (n = 0/8) | 0 (n = 0/10) | NA | NA | NA |
| **FSH [%]** | 1.7 - 21.5 mIU/ml | 0 (n = 0/8) | 10 (n = 1/10) ↑ | 1.000 | χ2(1) = 0.847 | -0.217 |
| **DHEAS [%]** | age dependent: | 13 (n = 1/8) ↓ | 30 (n = 3/10) ↓ | 0.588 |  |  |
| 20 - 24 years: 1.48 – 4.07 μg/ml |  |  |
| 25 - 34 years: 0.988 – 3.4 μg/ml | χ2(1) = 0.788 | -0.209 |
| 35 - 44 years: 0.609 – 3.37 μg/ml |  |  |
| 45 - 54 years: 0.354 – 2.56 μg/ml |  |  |
| **Testosterone [%]** | age dependent: | 25 (n = 2/8) ↑ | 11 (n = 1/9) ↓ | 0.559 |  |  |
| 18 – 49: 0.08 – 0.48 ng/ml | χ2(1) = 0.720 | 0.200 |
| > 50 years: 0.03 – 0.41 ng/ml |  |  |
| **Estradiol [%]** | 12 -398 pg/ml | 0 (n = 0/8) | 10 (n = 1/10) ↓ | 1.000 | χ2(1) = 0.847 | 0.217 |
| **Androstenedione [%]** | 0.3 – 2.4 ng/ml | 40 (n = 2/5) ↑ | 29 (n = 2/7) ↑ | 1.000 | χ2(1) = 0.064 | 0.060 |
| **Prolactin [%]** | 4.79 - 23.3 ng/ml | 50 (n = 4/8) ↑ | 30 (n = 3/10) ↑ | 0.630 | χ2(1) = 0.748 | 0.204 |
| **ACTH [%]** | 7.2 - 63.3 pg/ml | 0 (n = 0/8) | 11 (n = 1/9) ↑ | 1.000 | χ2(1) = 0.847 | -0.217 |
| **Cortisol [%]** | 4.82 – 19.5 μg/dl | 13 (n = 1/8) ↑ | 10 (n = 1/10) ↑ | 1.000 | χ2(1) = 0.028 | 0.040 |
| **GH [%]** | 0.126 – 9.88 ng/ml | 75 (n = 6/8) ↓ | 80 (n = 8/10) ↓ | 1.000 | χ2(1) = 0.064 | -0.060 |
| **IGF1 [%]** | age dependent: | 33 (n = 2/6) ↑ | 0 (n = 0/10) | 0.183 |  |  |
| 20 years: 107.8 - 416.0 ng/ml |  |  |
| 21 - 25 years: 92.9 - 342.0 ng/ml |  |  |
| 26 - 30 years: 78.4 - 270.0 ng/ml | χ2(1) = 2.813 | 0.40 |
| 31 - 35 years: 73.1 - 243.0 ng/ml |  |  |
| 36 - 40 years: 69.0 - 227.0 ng/ml |  |  |
| 41 - 45 years: 61.5 - 204.4 ng/ml |  |  |
| 46 - 50 years: 56.8 - 195.5 ng/ml |  |  |

The frequencies of laboratory abnormalities are presented as percentages and absolute values in parentheses. ↓ = decreased serum levels; ↑ = increased serum levels. For all group comparisons, Fisher's exact test with with the corresponding effect size Phi coefficient (φ) and a significance level set at <0.05 (two-sided) was performed. Abbreviations: ACTH = adrenocorticotropic hormone; cmH2O = centimeter water column; DHEAS = dehydroepiandrosterone sulfate; FSH = follicle-stimulating hormone; fT3 = triiodothyronine; fT4 = free thyroxine; GH = growth hormone; ICP = intracranial pressure; IGF-1 = insulin-like growth factor 1; LH = luteinizing hormone; n = absolute value; NA = not applicable; TSH = thyroid-stimulating hormone.
