# Supplementary material for: Structural MRI Biomarkers of Intracranial Pressure in IIH: Linking Optic Nerve Sheath, Pituitary Morphology, and Hormonal Changes
Source: Research Square preprint supplement (doi:10.21203/rs.3.rs-7177945/v1), 2025-08-07
Supplement: Supplementary file 2 [file 1f613b29aa170c91640ee5f7.docx]

**Supplementary Information**

Article Title: Structural MRI Biomarkers of Intracranial Pressure in IIH: Linking Optic Nerve Sheath, Pituitary Morphology, and Hormonal Changes

Journal: Clinical Neuroradiology

Authors: Zeynep Bendella, Barbara Daria Wichtmann, Ralf Clauberg, Wiebke Fenske, Charlotte Fries, Monika Jeub, Martina Minnerop, Arndt-Hendrik Schievelkamp, Franziskus M. Schützeichel, Bettina Wabbels, Christina Schaub, Max Witry, Berkan Koyak, Alexander Radbruch, Jennifer Linder, Ullrich Wüllner, Christine Kindler

Corresponding Author: Zeynep Bendella, MD

Affiliation: Department of Neuroradiology, University Hospital of Bonn, Bonn, Germany

E-Mail : [zeynep.bendella@ukbonn.de](mailto:zeynep.bendella@ukbonn.de)

**Table S2** Ophthalmologic Findings

|  | **Whole Group** | **ICP < 25 cmH2O** | **ICP ≥ 25 cmH2O** | ***P* Value** | **Test Statistic** | **Cohen's d/ Phi Coefficient (φ)** |
| --- | --- | --- | --- | --- | --- | --- |
| **Reported General Visual Disturbances [%]b** | 94 (n = 17/18) | 100 (n = 8/8) | 90 (n = 9/10) | 1.000 | χ2(1) = 0.000 | 0.217 |
| **Reported Obscurations [%]b** | 33 (n = 6/18) | 25 (n = 2/8) | 40 (n = 4/10) | 0.638 | χ2(1) = 0.028 | -0.158 |
| **Reported Double Vision [%]b** | 33 (n = 6/18) | 38 (n = 3/8) | 30 (n = 3/10) | 1.000 | χ2(1) = 0.000 | 0.079 |
| **Abducens Nerve Palsy [%]b** | 0 (n = 0/18) | 0 (n = 0/8) | 0 (n = 0/10) | NA | NA | NA |
| **MD RA [dB]a** | 3.9 [2.2, 7.7] (n = 14) | 3.9 [2.3, 4.7] (n = 6) | 4.7 [2.5, 8.5] (n = 8) | 0.852 | U = 22.0 | -0.195 |
| **MD LA [dB]a** | 1.8 [-0.2, 4.7] (n = 15) | 2.0 [1.6, 4.3] (n = 7) | 0.9 [-0.4, 4.6] (n = 8) | 0.779 | U = 31.0 | 0.168 |
| **Visual Acuity RA <20/25 (<0.8) [%]b** | 0 (n = 0/18) | 0 (n = 0/8) | 0 (n = 0/10) | NA | NA | NA |
| **Visual Acuity LA <20/25 (<0.8) [%]b** | 0 (n = 0/18) | 0 (n = 0/8) | 0 (n = 0/10) | NA | NA | NA |
| **Presence of Field Constrictions RA [%]b** | 38 (n = 5/13) | 33 (n = 2/6) | 43 (n = 3/7) | 1.000 | χ2(1) = 0.000 | -0.098 |
| **Presence of Field Constrictions LA [%]b** | 14 (n = 2/14) | 29 (n = 2/7) | 0 (n = 0/7) | 0.462 | χ2(1) = 0.583 | 0.408 |
| **EBS RA [%]b** | 79 (n = 11/14) | 100 (n = 6/6) | 63 (n = 5/8) | 0.209 | χ2(1) = 1.069 | 0.452 |
| **EBS LA [%]b** | 93 (n = 14/15) | 86 (n =6/7) | 100 (n = 8/8) | 0.467 | χ2(1) = 0.005 | 0.327 |
| **Frisén RA**a | 1.0 [1.0, 1.0] (n = 18) | 1.0 [1.0, 1.3] (n = 8) | 1.0 [0.3, 1.0] (n = 10) | 0.588 | U = 46.0 | -0.063 |
| **Frisén LA**a | 1.0 [1.0, 1.0] (n = 18) | 1.0 [1.0, 2.0] (n = 8) | 1.0 [0.3, 1.0] (n = 10) | 0.182 | U = 54.0 | 0.676 |
| **OCT ONH Vol. RA [mm3]** a | 2.9 [2.5, 2.9] (n = 18) | 2.9 [2.8, 3.0] (n = 8) | 2.6 [2.4, 2.9] (n = 10) | 0.247 | U = 53.5 | -0.146 |
| **OCT ONH Vol. LA [mm3]** a | 2.7 [2.5, 2.9] (n = 18) | 2.7 [2.5, 2.9] (n = 8) | 2.8 [2.4, 2.9] (n = 10) | 0.573 | U = 47.0 | 0.151 |

Examination of visual field parameters revealed unreliable indices in patients with normal ICP for the left eye in one subject and for the right eye in two subjects, as well as in patients with increased ICP for both eyes in two subjects each. Subjects with unreliable indices were excluded from further determination of MD, presence of visual field constrictions, and EBS. Dichotomous variables are presented as percentages and absolute numbers. CGF, MD and other non-normally distributed data are presented as medians with the 25th and 75th percentiles in square brackets, with number of valid observations. Either the Mann-Whitney U test (a), or Fisher's exact test (b) was performed, each with the corresponding effect size Cohen's d or the Phi coefficient (φ) and each with a and a two-sided significance threshold of p < 0.05. CGF = computerized visual field perimetry; cmH2O = centimeter water column; dB = decibel; EBS = enlarged blind spot; ICP = intracranial pressure; LA = left eye; MD = mean deviation; n = absolute number; NA = not applicable; OCT = optical coherence tomography; ONH Vol. = optic nerve head volume; RA = right eye
