# Supplementary material for: Structural MRI Biomarkers of Intracranial Pressure in IIH: Linking Optic Nerve Sheath, Pituitary Morphology, and Hormonal Changes
Source: Research Square preprint supplement (doi:10.21203/rs.3.rs-7177945/v1), 2025-08-07
Supplement: Supplementary file 3 [file 2c690057347e28c3e5ab300f.docx]

**Supplementary Information**

Article Title: Structural MRI Biomarkers of Intracranial Pressure in IIH: Linking Optic Nerve Sheath, Pituitary Morphology, and Hormonal Changes

Journal: Clinical Neuroradiology

Authors: Zeynep Bendella, Barbara Daria Wichtmann, Ralf Clauberg, Wiebke Fenske, Charlotte Fries, Monika Jeub, Martina Minnerop, Arndt-Hendrik Schievelkamp, Franziskus M. Schützeichel, Bettina Wabbels, Christina Schaub, Max Witry, Berkan Koyak, Alexander Radbruch, Jennifer Linder, Ullrich Wüllner, Christine Kindler

Corresponding Author: Zeynep Bendella, MD

Affiliation: Department of Neuroradiology, University Hospital of Bonn, Bonn, Germany

E-Mail : [zeynep.bendella@ukbonn.de](mailto:zeynep.bendella@ukbonn.de)

**Table S1** Medication Frequencies

|  | **ICP < 25 cmH2O**  **n = 8** | **ICP ≥ 25 cmH2O**  **n = 10** |
| --- | --- | --- |
| **IIH associated medication [%]** | 75 (n = 6) | 70 (n = 7) |
| **Acetazolamide [%]** | 63 (n = 5) | 50 (n = 5) |
| **Torsemide [%]** | 13 (n = 1) | 0 (n = 0) |
| **Diuretics [%]** | 13 (n = 1) | 30 (n = 3) |
| **Anticoagulants [%]** | 13 (n = 1) | 0 (n = 0) |
| **Antiplatelet medication [%]** | 13 (n = 1) | 0 (n = 0) |
| **Antihypertensive medication [%]** | 0 (n = 0) | 20 (n = 2) |
| **Proton-Pump Inhibitors [%]** | 38 (n = 3) | 30 (n = 3) |
| **L-Thyroxine [%]** | 13 (n = 1) | 30 (n = 3) |
| **Psychiatric medication [%]** | 13 (n = 1) | 20 (n = 2) |
| **Analgesic medication [%]** | 13 (n = 1) | 30 (n = 3) |
| **Food Supplements [%]** | 25 (n = 2) | 0 (n = 0) |

Frequencies of medication groups are presented as percentages and absolute values in parentheses. cmH2O = centimeter water column; ICP = intracranial pressure; L-Thyroxine = Levothyroxine; n = number.
