# Supplementary material for: Structural MRI Biomarkers of Intracranial Pressure in IIH: Linking Optic Nerve Sheath, Pituitary Morphology, and Hormonal Changes
Source: Research Square preprint supplement (doi:10.21203/rs.3.rs-7177945/v1), 2025-08-07
Supplement: Supplementary file 7 [file 9a14707ee9cffd9cd7f24940.docx]

**Supplementary Information**

Article Title: Structural MRI Biomarkers of Intracranial Pressure in IIH: Linking Optic Nerve Sheath, Pituitary Morphology, and Hormonal Changes

Journal: Clinical Neuroradiology

Authors: Zeynep Bendella, Barbara Daria Wichtmann, Ralf Clauberg, Wiebke Fenske, Charlotte Fries, Monika Jeub, Martina Minnerop, Arndt-Hendrik Schievelkamp, Franziskus M. Schützeichel, Bettina Wabbels, Christina Schaub, Max Witry, Berkan Koyak, Alexander Radbruch, Jennifer Linder, Ullrich Wüllner, Christine Kindler

Corresponding Author: Zeynep Bendella, MD

Affiliation: Department of Neuroradiology, University Hospital of Bonn, Bonn, Germany

E-Mail : [zeynep.bendella@ukbonn.de](mailto:zeynep.bendella@ukbonn.de)

**Table S4** Statistics and group comparison of serum levels of laboratory parameters between normal and increased ICP

| **Laboratory Parameter** | **ICP < 25 cmH2O** | **ICP ≥ 25 cmH2O** | **Group Comparison**  **Adjusted for Age, BMI & Pituitary Gland Volume** | | | |
| --- | --- | --- | --- | --- | --- | --- |
| ***N*** | ***P* Value** | **Test Statistics** | **Effect Size** |
| **TSH [μU/ml]** | 1.2 ± 0.7 (n = 8) | 2.0 ± 0.5 (n = 9) | 17 | 0.155 | F(4) = 2.021 | 0.403 |
| **fT3 [pg/ml]** | 3.0 ± 0.5 (n = 8) | 2.7 ± 0.3 (n = 8) | 16 | 0.821 | F(4) =0.377 | 0.121 |
| **fT4 [ng/dl]** | 1.2 ± 0.2 (n = 8) | 1.1 ± 0.1 (n = 9) | 17 | 0.069 | F(4) = 2.886 | 0.490 |
| **LH [U/l]a** | 8.3 [6.5, 18.7] (n = 8) | 6.0 [3.5, 11.4] (n = 9) | 17 | 0.183 | z(4) = -1.331 | 4.538 |
| **FSH [mIU/ml]** | 5.0 ± 1.9 (n = 8) | 6.0 [4.8, 7.9] (n = 8) | 17 | 0.354 | z(4) = 0.928 | 3.869 |
| **DHEAS [μg/ml]** | 2.1 ± 0.1 (n = 8) | 1.2 ± 0.7 (n = 9) | 17 | 0.231 | F(4) = 1626 | 0.351 |
| **Testosterone [ng/ml]** | 0.4 ± 0.2 (n = 8) | 0.2 ± 0.1 (n = 9) | 17 | **0.027*** | F(4) = 4.007 | 0.572 |
| **Estradiol [pg/ml]** | 97.0 ± 59.0 (n = 8) | 62.3 ± 51.7 (n = 9) | 17 | 0.742 | F(4) = 0.492 | 0.141 |
| **Androstenedione [ng/ml]** | 2.1 ± 1.1 (n = 8) | 1.4 ± 0.8 (n = 9) | 17 | 0.172 | F(4) = 1.918 | 0.390 |
| **Prolactin [ng/ml]a** | 22.5 ± 7.2 (n = 8) | 16.3 [14.5, 20.5] (n = 9) | 17 | 0.186 | z(4) = 1.323 | 7.942 |
| **ACTH [pg/ml]a** | 17.8 [15.4, 26.4] (n = 8) | 42.2 ± 37.1 (n = 9) | 16 | 0.113 | z(4) = 1.587 | 8.019 |
| **Cortisol [μg/dl]** | 13.0 ± 5.0 (n = 8) | 13.0 ± 2.9 (n = 9) | 17 | 0.962 | F(4) = 0.144 | 0.046 |
| **GH [ng/ml]a** | 0.2 [0.1, 0.6] (n = 8) | 0.1 [0.0, 0.1] (n = 9) | **17** | **0.581** | z(4) = -0.552 | 0.942 |
| **IGF1 [ng/ml]** | 205.8 ± 62.4 (n = 6) | 137.7 ± 46.4 (n = 9) | 15 | **0.039*** | F(4) = 3.828 | 0.605 |

Serum levels of laboratory parameters are presented as mean ± standard deviation (SD) for normally distributed data or as median [interquartile range (IQR)] for non-normally distributed data. Depending on the distribution, either analysis of covariance (ANCOVA) or a generalized linear model (GLM) was performed, with R² or McFadden's pseudo R², respectively, as the corresponding effect sizes. Statistical significance was determined using a two-sided p-value of < 0.05. ACTH = adrenocorticotropic hormone; cmH2O = centimeter water column; DHEAS = dehydroepiandrosterone sulfate; FSH = follicle-stimulating hormone; fT3 = triiodothyronine; fT4 = free thyroxine; GH = growth hormone; ICP = intracranial pressure; IGF-1 = insulin-like growth factor 1; LH = luteinizing hormone; TSH = thyroid-stimulating hormone.
